# Supplementary material for: Gluten-free food database: the nutritional quality and cost of packaged gluten-free foods
Source: PeerJ. 2015 Oct 22;3:e1337. doi: 10.7717/peerj.1337 (PMC4627916; doi:10.7717/peerj.1337)
Supplement: Supplemental Information 3 — Raw data [file peerj-03-1337-s004.xlsx]

## Sheet: dataset
Product	Food Category	Cost in €	Energy (kcal/100g)	Protein (g/100g)	Carbohydrates (g/100g)	Sugar (g/100g)	Total fat (g/100g)	Saturated fatty acids (g/100g)	Fiber (g/100g)	Sodium (mg/100g)	MUFA (mg/100g)	PUFA (mg/100g)	Cholesterol (mg/100g)	Iron (mg/100g)	Calcium (mg/100g)	Potassium (mg/100g)	Zinc (mg/100g)	Phosphorous (mg/100g)	Vitamin C (mg/100g)	Vitamin D (µg/100g)	Vitamin E (mg/100g)	Retinol (µg/100g)	Beta Carotin (µg/100g)	Thiamin (mg/100g)	Riboflavin (mg/100g)	Niacin (mg/100g)
0	1	2.99	349.9	6.13	73.45	0.43	3.06	0.42	4.17	3.19	0.54	1.87	0	2.13	41.4	270.47	1.2	103.21	0	0	0.09	0	0.01	0.11	0.05	0.33
0	1	2.95	341.2	1.42	81.8	1.64	0.4	0.05	3.49	2.85	0.12	0.2	0	0.71	22.93	25.21	0.79	54.31	0	0	0.12	0	0.03	0.05	0.02	0.24
0	1	6.48	338.35	3.2	77.45	17.79	1.24	0.25	2.25	39.67	0.52	0.49	0	1.17	54.73	240.21	1.08	204.11	0.12	0	0.04	0	0	0.03	0.02	0.58
0	1	6.48	394.7	2.63	82.88	52.54	5.38	3.08	2.83	41.71	1.84	0.37	9.47	1.23	17.52	252.71	0.79	118.76	0.32	0	0.06	0	0	0.02	0.02	0.41
0	1	8.54	319.8	6.15	68.11	1.46	2.07	0.41	4.08	782.79	0.84	0.78	0	1.59	92.75	382.07	1.81	749.29	0.74	0	0.08	0	0	0.06	0.05	1.18
0	1	15.96	325.66	5.56	71	1.44	1.68	0.34	3.69	784.7	0.67	0.63	0	1.39	85.88	313.61	1.48	692.4	0.03	0	0.07	0	0	0.05	0.04	1.11
0	1	13.9	407.65	0.54	84.01	0.02	7.29	2.27	0.79	9.1	3.52	1.4	0.07	1.06	19.32	22.6	0.49	28.61	0	0	0.73	0.01	9.01	0.01	0.03	0.25
0	1	12.04	293.92	11.17	56.25	0.7	2.29	0.29	11.21	383.57	0.29	1.05	0	3.44	44.03	343.37	3.28	337.86	0	0	1.32	0	0	0.49	0.05	0.37
0	2	9.98	238.36	3.67	51	0.7	1.86	0.32	1.37	120.53	0.75	0.64	0	0.38	10.58	75.45	0.48	35.9	0	0	1.01	0	0	0.06	0.02	0.48
0	2	7.48	263.61	8.5	40.79	5.14	7.16	0.94	8.39	685.79	2.17	3.86	0	2.41	96.43	304.1	1.7	208.75	0.01	0	0.23	0	0.01	0.21	0.1	1.33
0	2	13.56	220.29	2.34	40.57	3.67	5.22	0.75	3.96	392.48	2.35	1.87	0	0.55	32.75	66.97	0.35	48	0.06	0	3.14	0	0	0.05	0.08	0.84
0	2	8.21	229.37	7.35	37.45	0.53	5.38	2.01	8.56	396.1	1.59	1.19	0.04	2.61	35.28	479.06	2.13	222.69	0	0	0.96	0	0.75	0.3	0.14	3
0	2	12.45	259.24	1.36	48.72	5.21	6.21	2.97	1.62	402.11	2.3	0.67	4.02	0.6	17.67	52.68	0.39	36.52	0	0	0.48	0	1.28	0.03	0.06	0.48
0	2	33.27	213.37	3.32	44.87	2.9	1.98	0.3	8.27	355.74	0.77	0.82	0	1.03	17.15	117.38	0.86	91.38	1.2	0	1.05	0	0.08	0.14	0.09	0.97
0	2	13	260.97	3.98	49.1	18.59	4.16	1.47	1.57	299.48	1.41	1.08	0.37	1.01	59.31	157.72	0.73	80.86	0.43	0	0.08	0.02	0.04	0.07	0.09	0.51
0	2	13.27	293.21	3.72	52.15	13.82	7.46	2.15	2.69	314.9	1.89	3	32.64	0.82	30.76	91.38	0.5	73.71	0.01	0	0.19	0.06	0.05	0.07	0.14	1.09
0	2	14.25	270.12	4.49	56.64	6.35	2.52	0.44	5.33	336.38	1.03	0.88	0	0.66	13.96	120.93	0.41	48.25	0.84	0	1.41	0	0.01	0.07	0.06	0.62
0	2	15.96	343.82	4.78	59.23	7.83	9.44	4.73	2.17	790.76	3.16	0.7	7.06	0.4	124.3	137.68	0.57	78.43	13.1	0	0.49	0.02	1.29	0.04	0.15	0.15
0	2	11.27	343.87	0.3	82.47	0.8	0.89	0.27	0.68	5.52	0.4	0.2	0.01	1.06	21.34	11.95	0.4	20.24	0	0	0.08	0	1	0	0.01	0.09
0	2	18.69	351.56	6.9	77.77	5.96	0.91	0.17	2.9	547.2	0.25	0.38	0	0.67	11.61	99.13	0.67	109.04	0	0	0.24	0	0.04	0.11	0.04	1.38
0	2	4.58	228.67	3.06	38.83	0.38	7.52	2.17	2.78	402.35	1.78	3.21	0.63	0.21	18.09	83.57	0.19	39.96	0.25	0.23	0.07	0.05	0.06	0.03	0.01	0.58
0	3	7.96	335.91	8.19	69.89	1	2.17	0.3	7.18	1.88	0.66	1.07	0	1.8	14.67	114.68	1.87	205.75	0	0	0.81	0	0.21	0.33	0.1	1.76
0	3	4.58	329	8.66	66.29	1.33	2.82	0.36	9.42	1	0.88	1.44	0	2.4	18	120	2.5	256	0	0	1.11	0	0.3	0.44	0.13	1.93
0	3	9.91	338.35	6.93	72.36	4.29	1.85	0.31	4.87	1.9	0.51	0.88	0	3.15	22.73	198.37	1.43	211.4	0	0	0.48	0	0.12	0.28	0.12	1.61
0	3	7.96	373.01	6.95	76.3	0.78	3.97	1.08	2.42	55.98	1.56	0.82	146.52	1.37	30.53	91.97	1.32	144.47	0	0	0.89	0.1	0.04	0.1	0.18	0.52
0	3	5.78	371.22	12.48	71.6	1.99	3.36	0.42	13.54	6.71	0.97	1.66	0	3.81	45.15	297.12	3.05	327.38	0.93	0	1.68	0	0.31	0.51	0.16	2.14
0	3	10.11	370.85	12.09	71.97	1.92	3.33	0.42	13.13	5.94	0.97	1.66	0	3.65	41.7	274.68	3.02	321.78	0.8	0	1.62	0	0.32	0.51	0.16	2.14
0	3	9.48	345	8.8	73.8	1.5	1.1	0.1	5	1	0.4	0.4	0	1	4	80	0.41	73	0	0	0.52	0	0.26	0.13	0.04	1.2
0	4	12.28	392.25	5.53	72.58	33.98	8.5	4.73	4.57	504.01	3.07	0.55	15.77	1.51	17.98	265.98	0.52	73.86	0.13	0	0.25	0	0.51	0.05	0.06	0.96
0	4	5.2	477.96	7.14	64.85	16.74	21.02	7.66	4.75	393.96	10.27	2.51	0.16	1.72	44.88	314.76	1.6	174.62	0.11	0	3.54	0	1.78	0.2	0.09	1.4
0	4	19.12	322.42	8.48	62.87	1.38	3.72	0.59	7.55	575.88	1.07	1.57	0	1.52	8.61	265.44	1.45	208.76	0	0	1.47	0	0.9	0.35	0.2	1.47
0	5	42.62	385.26	3.28	73.55	13.83	8.31	2.73	1.16	408.14	3.9	1.51	17.31	0.66	33.19	79.97	0.59	72.93	0.22	0	0.84	0.02	9.02	0.05	0.1	0.73
0	5	11.95	236.03	2.49	22.93	18.09	15.03	8.32	3.26	16.2	5.24	1.08	21.7	0.71	8.86	259.18	0.59	61.06	0.01	0	0.12	0	0.01	0.03	0.03	0.37
0	5	18.95	479.2	1.97	64.31	5.72	23.79	11.88	2.27	199.3	8.49	2.51	3.37	0.82	13.2	91.1	0.73	57.96	0	0	1.66	0	4.5	0.05	0.02	0.26
0	5	11.16	507.91	4.96	53.96	41.71	30.42	13.91	5.63	417.91	11.9	3.73	28.84	2.7	28.12	476.92	1.16	124.82	0.02	0	1.31	0	0.03	0.09	0.06	0.68
0	5	18.3	403.72	5.39	48.12	20.73	22.6	3.79	0.77	54.88	10.15	7.37	138.6	1.32	22.11	103.26	0.76	98.91	0	0	12.54	0.1	0.02	0.05	0.15	0.24
0	5	13.41	356.9	5.71	74.62	33.12	3.49	1	2.47	98.46	1.39	0.61	141.37	1	37.26	79.88	0.8	100.96	0	0	0.72	0.1	0	0.05	0.15	0.28
0	5	36	471.12	4.59	71.78	21.07	18.24	7.78	3.55	295.19	6.81	2.8	5.16	1.17	15.24	68.83	0.78	89.3	0.13	0	0.37	0	0.12	0.14	0.05	0.87
0	5	23.9	400.8	7.17	59.19	24.98	14.82	6.96	12.88	237.91	5.34	1.72	4.24	2.14	96.16	292.51	1.37	170.55	0.45	0	1	0.01	0.16	0.19	0.19	1.23
0	5	19.95	516.96	7.45	55.16	35.42	29.57	18.43	1.55	157.12	8.85	0.87	7.42	1.71	159.96	361.06	0.95	154.17	8.01	0	0.43	0.1	0.39	0.07	0.18	0.58
0	5	23.9	349.14	5.02	65.18	64.02	6.98	2.64	3.57	224.2	2.06	1.96	39.14	1.78	46.96	417.13	0.72	86.83	1.55	0	0.35	0.02	0.15	0.09	0.08	0.32
0	5	18.95	270.87	4.16	43.18	18.07	8.72	3.43	1.56	102.98	2.89	2.17	1.83	1.13	177.03	240.82	0.68	128.36	4.75	0	0.16	0.05	0.08	0.07	0.27	0.25
0	5	18.95	371.59	5.15	55.76	29.97	14.63	4.11	3.47	247.84	3.36	2.17	79.2	2.66	29.5	219.98	0.74	102.31	0	0	3.54	0.06	0.01	0.06	0.11	0.3
0	6	22.38	340.81	10.05	43.52	0.04	13.79	9.25	0.26	2416.36	3.27	0.4	47.71	1.4	434.99	83.08	2.05	305.78	0.43	0	0.41	0.13	0.06	0.03	0.12	0.48
0	6	16.5	449.72	0.47	65.54	0.76	20.57	9.83	0.77	554.28	7.54	2.36	0.2	0.67	11.72	17.23	0.45	26.93	0	0	1.48	0	4.26	0.01	0.03	0.21
0	6	21.5	392.53	1.96	67.36	2.58	12.56	3.91	0.68	226.87	6.06	2.36	20.01	0.63	52.59	64.73	0.62	62.82	0.06	0	1.31	0.03	15.02	0.02	0.09	0.07
0	6	16.63	480.85	0.57	71.96	1.5	21.09	10.25	0.81	1007.36	7.83	2.17	0.21	0.93	15.82	25.22	0.47	30.69	0	0	1.56	0	4.47	0.02	0.04	0.34
0	6	14.25	329.67	8.6	63.77	1.4	4.08	0.64	7.65	119.98	1.16	1.76	0.01	1.5	8.15	268.55	1.47	211.73	0.02	0	1.61	0	0.92	0.36	0.2	1.49
0	7	14.97	235.08	8.04	24.78	2.75	11.47	4.81	1.51	614.15	4.14	1.9	22.66	0.97	103.75	275.57	1.13	115.28	7.43	0	3.23	0.04	0.24	0.11	0.11	1.68
0	7	14.11	209.09	6.25	27.61	3.48	8.04	3.76	1.99	437.51	2.52	1.27	14.95	0.68	110.73	266.87	0.85	106.1	6.97	0	2.97	0.05	0.26	0.05	0.1	1.02
0	7	15.3	170.43	7.36	16.37	2.19	8.33	3.78	1.14	450.21	3.22	0.78	38.88	0.79	56.08	211.47	1.38	99.6	5.51	0.02	1.14	0.04	0.24	0.11	0.13	1.51
0	7	17.63	251.24	15.29	22.54	0.49	11.02	1.48	2.99	396.19	4.17	4.75	35	1.34	16.8	158.47	1.37	179.53	0.05	0	5.46	0	0.16	0.14	0.09	4.71
0	7	28.17	216	9.21	28.13	3.96	7.25	0.78	1.85	378.34	1.75	3.84	23.54	1.19	24.87	128.33	0.49	142.5	0.24	0	4.04	0	0.11	0.12	0.22	1.62
0	7	28.17	285.26	7.66	48.12	1.28	6.64	2.47	1.73	628.05	2.49	1.01	72.33	1.49	51.06	118.68	1.64	122.19	1.06	0.01	0.75	0.04	0.04	0.24	0.12	1.38
0	7	16.64	355.87	16.24	47.74	7.89	10.4	2.16	8.3	3801.76	4.34	2.55	1.03	2.53	80.57	1014.25	0.88	260.47	11.7	0	1.61	0	0.42	0.17	0.28	4.63
0	7	12.23	431.43	15.45	43.42	13.68	21.73	2.09	1.62	472.57	10.15	5.67	0.43	0.89	17.52	104.01	0.22	34.9	0.95	0	3.82	0	0.68	0.04	0.07	0.91
0	7	11.98	278	5.21	27.82	24.22	16.19	5.89	3.47	101.42	7.01	2.86	22.61	1.39	97.43	358.09	0.78	127.37	0.81	0.12	3.66	0.02	0.04	0.04	0.16	0.37
0	7	80.81	362.53	6.16	81.96	14.78	0.55	0.13	1.79	117.48	0.15	0.2	0	0.54	9.64	91.27	0.5	79.69	0.1	0	0.09	0	0	0.06	0.02	1.18
0	7	2.99	483.94	4.29	43.34	21.6	32.88	15.71	4.4	108.3	12.01	3.63	0.32	1.61	30.08	138.24	1.3	202.23	0.7	0	2.87	0	6.82	0.18	0.09	1.91
0	7	17.16	329.24	1.05	79.14	0.15	0.4	0.06	1.17	6.98	0.1	0.2	0	1.8	31.88	26.15	0.43	35.54	0	0	0.12	0	0.03	0.05	0.02	0.33
0	7	14.98	56.89	1.05	11.02	0.18	0.89	0.13	0.36	52.58	0.4	0.31	0	0.23	12.47	17.01	0.2	15.55	0	0	0.51	0	0	0.01	0	0.19
0	7	4.81	389.51	1.42	31.55	2.05	28.95	8.12	5.26	412	7.25	12.3	2.35	0.22	49.65	47.07	0.2	24.56	0.13	0.03	2.1	0	0.17	0.24	0.01	0.22
0	7	14.98	405.24	6.97	25.11	24.43	31.1	10.85	2	120.14	13.06	4.32	170.2	1.69	39.44	219.39	0.9	126.96	0.21	0.13	4.26	0.15	2.19	0.06	0.16	0.38
1	1	0.55	337.07	12.31	68.39	0.2	1.07	0.2	4.01	1.95	0.1	0.49	0	0.98	16.61	146.55	0.76	0	0	0	0.2	0	0	0.11	0.08	0.49
1	1	1.39	343	10.04	72.34	0.73	0.98	0.14	2.75	1	0.12	0.45	0	0.57	5	168	0.51	62	0	0	0.18	0	0	0.1	0.01	0.7
1	1	0.55	338.1	12.35	68.6	0.2	1.08	0.2	4.02	1.96	0.1	0.49	0	0.98	16.66	147	0.77	0	0	0	0.2	0	0	0.11	0.08	0.49
1	1	1.39	343	10.04	72.34	0.73	0.98	0.14	2.75	1	0.12	0.45	0	0.57	5	168	0.51	62	0	0	0.18	0	0	0.1	0.01	0.7
1	1	7.96	368.29	9	78.1	15.65	1.67	0.37	2.26	11.44	0.45	0.48	28.8	0.7	8.55	144.92	0.55	66.54	0	0	0.19	0.02	0	0.09	0.04	0.57
1	1	3.98	289.68	5.82	64.33	20.38	0.56	0.08	1.59	178.22	0.07	0.26	0	0.38	20.3	97.34	0.34	162.34	0	0	0.1	0	0	0.06	0.01	0.4
1	1	5.64	324.76	6.46	67.59	23.1	2.73	1.46	3.17	17.3	0.81	0.3	2.52	2.75	11.33	300.75	0.67	75.77	0	0	0.12	0	0	0.06	0.02	0.49
1	1	8.33	333.25	7.12	64.32	26.39	4.9	2.79	4.02	258.13	1.54	0.38	6.94	2.89	36.27	357.72	0.83	254.22	0	0	0.14	0	0	0.06	0.02	0.56
1	1	n.d	389	8.59	64.79	3.51	10.32	4.34	2.31	587.94	3.68	1.65	2.85	0.49	39.63	142.67	0.52	306.17	0	0	0.15	0	0	0.09	0.01	0.59
1	1	n.d	335.3	11.94	66.3	0.78	2.05	0.3	3.58	581.27	0.23	0.94	0	2.93	43.95	336.36	3.78	457.61	0	0	0.32	0	0	0.36	0.12	1.69
1	1	5.69	335.88	10.58	69.85	1.08	1.06	0.19	3.54	736.4	0.1	0.29	0	1.18	51.27	163.96	0.92	367.08	0	0	0.19	0	0	0.12	0.14	0.84
1	1	5.69	301.01	11.31	57.87	0.7	2.28	0.29	9.66	796.34	0.29	1.05	0	3.44	71.1	340.74	3.39	633.99	0	0	1.33	0	0	0.5	0.23	5.27
1	1	0.89	339.67	11.25	70.26	0.88	1	0.15	3.62	81.05	0.13	0.46	0	1.5	9.09	255.61	0.87	121.12	0	0	0.18	0	0	0.21	0.23	2.39
1	1	3.38	340.22	10.99	70.66	0.85	1	0.14	3.44	80.56	0.13	0.46	0	1.3	8.34	237.29	0.8	108.84	0	0	0.18	0	0	0.19	0.18	2.04
1	1	2.48	337.03	10.27	70.65	0.77	0.97	0.14	2.98	584.47	0.12	0.45	0	0.85	9.8	193.02	0.62	81.74	0	0	0.18	0	0	0.14	0.08	1.22
1	1	2.98	304.05	11.59	58.2	0.74	2.35	0.29	10.02	586.41	0.3	1.08	0	3.6	35.99	356.95	3.42	356.25	0	0	1.36	0	0	0.52	0.26	5.58
1	2	1.5	227.46	7.66	46.82	1.65	0.71	0.14	3.38	1556.97	0.09	0.29	0	1.43	21.8	186.49	0.82	108.59	0	0	0.15	0	0	0.17	0.2	1.86
1	2	2.38	249.45	8.14	51.61	1.84	0.77	0.17	3.53	1168.08	0.1	0.3	0	1.31	20.08	178.33	0.8	100.53	0	0	0.17	0	0	0.16	0.16	1.55
1	2	3.48	211.95	7.16	34.19	0.86	4.99	0.68	8.09	386.61	1.17	2.82	0	3.06	41.96	327.71	1.91	249.95	0	0	2.48	0	0.01	0.33	0.13	1.67
1	2	4.69	233.99	6.72	48.24	1.09	1.23	0.21	9.14	472.57	0.14	0.54	0	2	32.15	355.95	1.95	237.6	0	0	0.91	0	0.01	0.26	0.12	1.25
1	2	1.1	217.32	7.68	43.53	0.83	1.07	0.22	2.45	468.83	0.27	0.39	0	0.94	12.29	159.57	0.54	77.09	0	0	0.36	0	0	0.13	0.14	1.49
1	2	4.7	253.27	7.89	46.71	2.56	3.58	2.05	2.49	391.34	0.89	0.31	0.01	0.95	12.31	161.65	0.56	78.21	0.01	0	0.18	0.02	0.01	0.13	0.14	1.5
1	2	4.7	301.5	8.91	57.28	1.65	3.71	2.04	2.66	351.9	0.91	0.39	0.01	0.84	10.46	169.44	0.56	75.43	0.01	0	0.21	0.02	0.01	0.13	0.1	1.26
1	2	1.1	263.82	8.07	54.03	1.05	1.26	0.22	2.29	473.83	0.33	0.41	0.01	0.46	9.79	124.36	0.39	48.46	0	0	0.22	0	0.02	0.09	0.03	0.67
1	2	1.5	252.63	8.35	52.19	1.66	0.74	0.11	2.74	836.38	0.1	0.34	0	1.2	13.96	196.02	0.68	97.38	0	0	0.13	0	0	0.16	0.19	1.92
1	2	3.31	263.2	9.27	50.66	1.18	2.27	0.29	2.91	785.23	0.66	0.75	25.82	1.91	19.44	210.15	0.88	124.3	0	0	0.3	0.02	0.03	0.18	0.21	2.28
1	2	3.37	246.95	8.64	47.82	2.02	2.01	0.29	3.15	514.53	1.12	0.43	0.01	1.75	15.95	242.9	0.88	130.22	0	0	0.28	0	0	0.23	0.32	2.95
1	2	3.3	249.05	8.13	51.54	1.86	0.77	0.11	3.71	397.97	0.1	0.36	0	1.72	15.4	217.57	0.95	120.74	0	0	0.17	0	0	0.2	0.25	2.27
1	2	10.76	320.03	7.14	55.83	18.96	7.64	2.87	2.58	354.33	2.85	1.29	35.35	1.52	20.98	254.86	0.71	110.13	0.1	0	0.45	0.02	0.03	0.16	0.23	1.81
1	2	4.57	323.73	7.7	59.21	16.28	5.5	0.61	2.68	385.81	2.42	1.42	10.47	1.18	40.57	281.39	0.6	102.85	0.14	0	1.08	0.01	0.15	0.15	0.21	1.42
1	2	8.54	332.29	7.95	55.45	12.94	8.45	1.4	1.7	445.96	3.68	1.9	25.08	0.73	44.99	185.44	0.53	82.24	0.49	0	1.63	0.37	2.27	0.09	0.1	0.55
1	2	3.1	336.97	8.12	54.77	14.3	9.22	1.08	1.75	472.34	4.21	2.22	43.71	0.79	35.58	159.31	0.62	91.1	39.6	0	1.75	0.03	0.25	0.1	0.13	0.78
1	2	2.3	267.99	8.93	55.25	1.71	0.78	0.11	2.95	514.93	0.11	0.36	0	1.32	12.02	212.7	0.74	104.96	0	0	0.14	0	0	0.18	0.21	2.13
1	2	1.5	251.02	9.37	50.58	1.78	0.76	0.11	3.47	533.89	0.11	0.35	0	1.97	14.61	269.26	0.97	145	0	0	0.14	0	0	0.25	0.37	3.34
1	2	2.92	214.53	8.43	41.48	2	1.35	0.19	4.01	503.01	0.23	0.73	0	2.11	20.56	269.43	0.99	150.3	0	0	0.12	0	0	0.26	0.41	3.6
1	2	3.47	265.47	7.79	49.63	0.91	3.66	1.24	2.5	1023.16	1.28	0.73	0.04	0.99	14.87	172.59	0.59	84.39	0	0	0.43	0	0.49	0.14	0.15	1.58
1	2	5.5	357.46	8.65	66.79	9.64	5.8	2.34	2.61	429.15	1.99	1.04	1.5	0.92	8.64	174.09	0.58	78.08	0	0	0.15	0	0	0.15	0.13	1.43
1	2	7.95	409.41	11.84	71.69	9.98	7.96	3.55	4.5	200.18	2.7	1.09	0.07	0.73	6.51	158.95	0.51	65.76	0	0	0.67	0	1.49	0.12	0.08	1.06
1	2	11.12	324.42	8.25	63.35	5.06	3.82	0.55	2.24	626.94	1.48	1.43	0.1	0.49	14.94	149.83	0.43	57.17	0.09	0	2.01	0	0	0.08	0.02	0.59
1	2	19.9	353.84	9.74	65.17	0.68	5.63	1.83	4.18	609.41	1.52	1.72	0.03	1.2	11.49	196.04	1.12	120.59	0	0	0.66	0	0.64	0.18	0.05	1.65
1	2	6.84	303.02	6.63	49.24	1.98	8.15	1.16	1.82	584.15	3.52	2.96	0	0.39	9.34	111.05	0.34	43.17	0	0	4.78	0	0	0.07	0.01	0.46
1	2	8.41	273.88	7.64	46.4	0.47	5.69	0.56	1.78	642.56	2.52	1.49	0.1	0.37	9.98	107.76	0.33	42.36	0	0	1.05	0	0.17	0.07	0.01	0.45
1	3	0.88	338.28	11.8	68.9	0.83	1.2	0.12	4.5	2	0.2	0.57	0	3.5	34	431	4.2	508	0	0	1	0	0	0.4	0.1	6.7
1	3	3.18	336.59	11.74	68.56	0.83	1.19	0.12	4.48	2.01	0.2	0.57	0	3.48	33.88	428.85	4.18	505.46	0	0	1	0	0	0.4	0.1	6.67
1	3	0.88	338.28	11.8	68.9	0.83	1.2	0.12	4.5	2	0.2	0.57	0	3.5	34	431	4.2	508	0	0	1	0	0	0.4	0.1	6.7
1	3	3.18	336.59	11.74	68.56	0.83	1.19	0.12	4.48	2.01	0.2	0.57	0	3.48	33.88	428.85	4.18	505.46	0	0	1	0	0	0.4	0.1	6.67
1	3	3.18	336.59	11.74	68.56	0.83	1.19	0.12	4.48	2.01	0.2	0.57	0	3.48	33.88	428.85	4.18	505.46	0	0	1	0	0	0.4	0.1	6.67
1	3	3.18	336.59	11.74	68.56	0.83	1.19	0.12	4.48	2.01	0.2	0.57	0	3.48	33.88	428.85	4.18	505.46	0	0	1	0	0	0.4	0.1	6.67
1	3	4.76	344.36	10.89	70.73	0.5	1.5	0.3	3.1	8.99	0.2	0.92	0	1.47	25.07	165.16	4.87	128.29	0	0	0.8	0	0	0.12	0.04	1.3
1	3	5.56	344.7	10.9	70.8	0.5	1.5	0.3	3.1	9	0.2	0.92	0	1.48	25.09	165.33	4.87	128.42	0	0	0.8	0	0	0.12	0.04	1.3
1	3	5.16	366.89	13.41	68.97	0.85	3.69	0.94	3	43.28	1.1	1.26	95.04	1.87	36.55	195.48	5.08	174.84	0	0	1.25	0.07	0	0.14	0.13	1.28
1	3	4.76	355.07	11.63	71.48	1.4	1.95	0.63	3.57	38.46	0.24	0.96	0	2.36	55.52	309.96	4.96	138.33	13.4	0	1.16	0	1.25	0.14	0.09	1.45
1	3	3.98	367.27	13.12	70.11	0.8	3.34	0.84	3.06	37.67	0.96	1.22	79.2	1.82	34.94	192.42	5.1	168.62	0	0	1.18	0.06	0	0.14	0.12	1.3
1	3	3.98	360.96	13.82	65.63	0.95	4.36	1.14	2.85	54.36	1.4	1.34	126.72	1.94	39.4	199.14	4.96	185.35	0	0	1.36	0.09	0	0.14	0.17	1.22
1	3	3.18	344.7	10.9	70.8	0.5	1.5	0.3	3.1	9	0.2	0.92	0	1.48	25.09	165.33	4.87	128.42	0	0	0.8	0	0	0.12	0.04	1.3
1	3	3.58	344.7	10.9	70.8	0.5	1.5	0.3	3.1	9	0.2	0.92	0	1.48	25.09	165.33	4.87	128.42	0	0	0.8	0	0	0.12	0.04	1.3
1	4	3.98	382.47	7.39	49.73	16.68	17.04	7.16	6	85.26	6.19	2.92	5.34	2.92	11.45	272.95	2.07	186.95	0.11	0	0.43	0	0	0.3	0.02	0.59
1	4	6.65	441.08	6.99	56.35	23.93	20.81	9.26	5.48	49.59	7.73	2.93	2.69	2.41	12.83	233.62	1.91	173.38	0.01	0	1.6	0	3.41	0.29	0.03	0.62
1	4	9.31	487.15	11.2	57.23	20.2	23.7	6.65	6.76	216.24	11.85	4.21	0.12	3.23	33	351.9	2.65	249.43	0.11	0	3.45	0	2.15	0.4	0.09	1.28
1	4	7.76	410.48	13.5	49.9	7.79	17.33	2.07	11.34	19.32	10.28	4.36	0	4.26	50.95	500.83	3.35	306.36	0.41	0	3.86	0	0.07	0.48	0.07	1.61
1	4	1.98	330.53	8.18	65.48	6.33	3.58	0.57	7.38	199.93	1.02	1.51	0	1.46	9.02	254.84	1.4	202.17	0	0	1.41	0	0.87	0.35	0.21	1.54
1	4	5.98	332.6	7.66	67.07	12.26	3.32	0.54	7.34	393.86	1.57	3.32	0.03	22.19	334.9	655.8	4.47	807.67	134	0	1.94	0	0.93	5.76	7.5	60.2
1	5	9.95	409.8	6.81	67.47	23.78	12.01	7.05	1.68	592.86	3.16	0.99	1.43	0.43	29.9	128.12	0.41	56.87	0.24	0	0.36	0.08	0.05	0.07	0.04	0.45
1	5	3.4	409	7.27	68.59	29.9	11.39	7.1	1.49	424.29	3.06	0.48	0.18	0.46	72.29	178.34	0.52	89.21	0.13	0	0.36	0.08	0.05	0.08	0.12	0.44
1	5	3.38	536.34	4.91	53.72	44.07	33.71	15.87	2.15	79.82	13.53	3.23	12.17	1.1	90.79	273.71	0.65	100.97	0.78	0	2.92	0.02	5.55	0.06	0.12	0.33
1	5	8.2	512.58	4.44	59.54	39.73	28.63	13.14	3.18	100.77	10.65	3.68	18.46	1.97	11.97	287.14	0.63	67.05	0.01	0	0.46	0.01	0.32	0.04	0.02	0.4
1	5	4.4	474.88	5.77	57.92	35.29	24.47	12.75	4.41	45.68	8.91	2.04	38.42	0.95	25.16	355.77	0.79	93.37	0.04	0	1.3	0.01	3.2	0.06	0.07	0.54
1	5	14.2	498.9	7.52	62.52	24.94	24.24	11.39	2.09	38.94	8.92	2.93	14.93	0.53	89.37	234.5	0.63	100.24	0.88	0	0.36	0.02	0.65	0.08	0.12	0.47
1	5	3.38	537.41	4.75	55.1	42.58	33.28	15.68	2.17	35.61	13.4	3.12	11.46	0.95	74.93	254	0.59	90.34	0.67	0	2.92	0.01	5.55	0.06	0.1	0.34
1	5	8.2	507.13	4.72	61.52	42.22	26.98	12.64	3.83	223.29	10.11	3.23	20.73	2.08	14.18	338.51	0.72	77.37	0.01	0	0.41	0	0.21	0.05	0.03	0.46
1	5	4.98	388.53	6.02	54.13	20.5	16.9	2.62	1.15	23.63	7.54	5.77	63.36	0.59	10.56	93.19	0.46	59.32	0	0	9.72	0.04	0.01	0.06	0.07	0.3
1	5	2.98	421.54	5.52	54.84	22.08	22.97	4	1.89	1987.71	9.96	7.51	75.24	0.79	13.64	84.53	0.5	59.42	0	0	12.85	0.05	0.01	0.04	0.08	0.2
1	5	9	319.85	6.94	64.73	42.03	3.27	0.9	0.87	46.29	1.24	0.63	125.53	0.88	18.2	100.97	0.64	86.25	0	0	0.68	0.09	0	0.06	0.13	0.25
1	5	4.5	390.13	9.03	78.39	46.1	3.98	1.09	1.24	55.71	1.49	0.79	150.48	1.08	22.14	133.01	0.81	107.8	0	0	0.82	0.1	0	0.09	0.16	0.35
1	5	11.5	420.38	8.15	62.91	23.16	14.79	3.48	6.7	390.41	5.6	4.6	5.83	2.41	36.98	246.46	2.34	245.25	0.02	0	6.22	0	0.86	0.32	0.14	3.49
1	5	11.1	459.29	8.5	60.11	23.97	20.45	10.27	5.1	84.37	6.66	1.88	51.96	5.94	15.48	270	2.11	192.87	0.02	0	1.79	0.08	2.12	0.31	0.07	0.87
1	5	14.31	407.25	7.62	59.21	21.89	15.36	5.83	5.36	53.37	8.66	3.84	6	2.82	17.52	291.65	1.95	180.26	0.84	0	0.46	0	0	0.32	0.04	0.63
1	5	18.93	372.14	6.96	46.93	37.67	16.93	4.25	19.74	24.55	9.69	2.41	6.26	3.14	92.4	584.34	1.72	224.79	11.36	0	4.73	0.01	1.13	0.17	0.16	3.07
1	5	3.3	401.33	3.52	68.29	54.4	12.27	6.31	3.42	101.85	4.36	1.22	31.57	1.09	50.32	298.38	0.57	63.13	5.64	0	0.61	0.01	1.18	0.06	0.06	0.37
1	5	15.92	414.95	3.58	67.94	57.07	14.04	6.85	1.43	79.7	4.98	1.58	31.11	0.88	61.54	210.15	0.51	64.8	10.9	0	1.04	0.03	2.14	0.07	0.1	0.28
1	5	15.9	486.44	4.49	66.69	34.87	22.28	2.39	0.89	306.98	10.43	5.5	63.75	0.63	10.85	85.62	0.47	54.6	6.08	0	4.12	0.04	0.66	0.05	0.07	0.24
1	5	3.3	394.86	3.46	67.07	52.24	12.17	4.09	2.27	100.53	5	1.89	28.33	0.92	16.93	215.92	0.47	50.4	6.76	0	1.38	0.01	0.81	0.06	0.05	0.32
1	5	2.48	226.82	3.04	31.95	11.84	9.49	4.11	1.47	157.01	3.47	1.38	2.72	0.55	18	101	0.22	29.64	0.07	0	0.11	0	0	0.05	0.01	0.25
1	5	2.48	241.71	2.42	27.81	8.75	13.37	3.65	1.54	365.69	5.73	2.52	0.2	0.61	18.63	90.38	0.16	21.71	3.62	0	1.97	0.01	1.57	0.03	0.01	0.27
1	5	8.33	373.38	7.74	67.02	31.52	7.91	4.65	7.07	333.98	2.55	0.47	12.62	3.64	51.43	472.19	1.05	317.71	0.01	0	0.15	0	0	0.07	0.03	0.63
1	5	10.63	386.02	7.17	74.29	39.38	6.13	3.02	3.97	293.14	2	0.85	5.48	3.2	30.13	314.4	1.2	187.28	0.27	0	0.31	0	0.42	0.15	0.06	0.86
1	6	7.92	427.68	9.87	44.51	1.14	23.36	14.87	3	1260.71	6.27	0.8	6.11	1.45	105.26	225.14	1.14	172.14	0.24	0	0.66	0.16	0.1	0.22	0.31	2.55
1	6	15.12	425.3	10.01	48.26	0.83	21.31	13.56	2.45	307.47	5.79	0.97	6.96	6.41	130.26	728.59	3.22	499.9	0.18	0	0.7	0.15	0.1	0.77	1.39	11.31
1	6	8	341.66	9.52	67.17	0.72	3.44	0.49	2.99	1555.3	1.26	1.32	0	0.71	15.53	167.05	0.53	72.49	0	0	1.72	0	0	0.14	0.08	1.14
1	6	1.38	345.45	9.95	67.69	1.25	3.43	0.49	2.95	1206.3	1.26	1.32	0	0.93	13.98	194.72	0.63	87.49	0	0	1.72	0	0	0.14	0.1	1.36
1	6	5.95	427.97	11.83	54.6	0.69	17.91	6.09	3.88	145.79	6.72	4.18	0.1	2.43	115.95	234.54	1.74	196.75	0	0	0.91	0	2.14	0.61	0.18	2.7
1	6	7.56	375.46	9.93	66.21	1.05	7.52	3.35	3	196.47	2.57	1.09	0.07	1.01	7.82	201.29	0.66	88.87	0	0	0.65	0	1.41	0.15	0.12	1.53
1	6	8	364.65	10.7	72.82	0.82	2.91	0.32	3.14	1200.52	1.05	0.91	0.04	0.95	33.17	205.83	0.67	91.08	0	0	0.54	0	0.06	0.15	0.1	1.39
1	6	n.d	387.85	10.28	72.7	1.38	5.78	2.28	2.9	1856.44	1.93	1.09	1.44	0.88	15.29	185.68	0.6	81.58	0	0	0.18	0	0	0.16	0.1	1.39
1	6	6.36	280.08	9.34	56.18	0.96	1.59	0.28	12.9	588.49	0.2	0.66	0	3.32	40.7	539.06	2.84	359.85	0	0	1.27	0	0	0.45	0.36	3.06
1	6	9.9	339.7	14	64	1.2	2.6	0.2	8.4	4	0.3	1.3	0	4.4	25	415	3.6	422	0	0	0.2	0	0	0.3	0.2	6.6
1	7	9.97	288.85	11.5	29.43	5.2	13.77	4.98	2.54	561.72	5.27	2.01	18.56	1.73	172.27	565.24	1.64	213.04	13.97	0	3.05	0.04	0.64	0.23	0.22	3.24
1	7	2.26	281.24	11.19	31.25	4.15	12.24	3.69	2.54	513.69	4.99	2.08	15.06	1.63	105.46	486.83	1.43	178.89	10.97	0.07	2.69	0.03	0.56	0.23	0.26	3.25
1	7	9.97	225.57	8.84	30.55	4.41	7.39	3.64	2.33	590.59	2.26	0.75	20.24	1.07	108	311.01	1	121.05	6.9	0	1.5	0.04	0.33	0.12	0.16	1.45
1	7	2.17	265.46	9.82	34.36	3.92	9.67	2.73	2.86	485.22	3.78	1.74	8.76	1.68	97.14	466.05	1.22	168.67	9.57	0.04	2.63	0.03	0.55	0.21	0.3	2.97
1	7	8.54	130.17	6.01	13.42	2.04	5.74	2.28	1.13	491.95	2.08	0.97	24.84	1.02	95.83	263.7	1.5	159.95	1.52	0.01	2.1	0.03	0.32	0.09	0.09	1.72
1	7	6.23	199.47	6.7	14.64	1.84	12.74	3.06	1	228.18	5.8	2.17	32.04	0.95	56.91	235.42	1.26	135.42	2.33	0.08	2.08	0.01	0.37	0.16	0.09	1.59
1	7	3.99	269.73	16.07	19.73	2.03	14.07	1.43	0.75	528.88	6.24	4.17	38.72	0.97	14.36	181.3	0.86	134.59	0.06	0	2.54	0	0.42	0.03	0.08	4.91
1	7	9.58	252.07	15.43	20.86	0.81	11.84	1.21	0.99	396.6	5.18	3.57	34.48	0.94	13.87	187.99	0.81	126.82	0.42	0	2.14	0	0.39	0.04	0.08	4.48
1	7	8.87	287.73	9.55	27.71	1.66	15.44	1.91	1.36	606.75	9.18	2.66	19.04	0.75	34.41	163.32	0.66	183.83	0.85	0.39	2.58	0	0.21	0.04	0.09	1.21
1	7	3.53	236.3	15.5	23.81	0.93	8.61	1.42	1.15	379.62	2.78	3.89	63.51	0.66	10.63	281.83	0.33	161.9	0.8	0.22	2.6	0	0	0.11	0.32	2.05
1	7	2.36	310.4	11.65	48.63	2.25	7.15	2.61	2.69	805.34	2.65	1.26	67.45	1.96	39.7	400.61	2.11	249.43	0.68	0.04	0.83	0.04	0.25	0.25	0.14	2.86
1	7	6.64	272.08	11.34	44.14	1.21	5.22	1.68	2.63	752.13	1.99	0.87	48.59	2.81	42.8	330.29	2.91	312.05	0.18	0	0.87	0.03	0.02	0.38	0.13	4.14
1	7	13.49	493.76	8	46.96	9.44	30.55	14.6	2.37	2402.29	11.45	3.16	3.78	1.32	46.63	264.66	0.75	115.48	7.59	0	2.35	0	6.12	0.14	0.16	1.74
1	7	21.06	363.36	11.66	28.67	10.08	22.38	10.82	11.61	3041.04	8.25	2.39	0.22	7.55	72.49	533.8	1.13	215.23	116.62	0	1.94	0	5.15	0.28	0.39	3.88
1	7	11.13	344.32	7.99	46.97	5.21	13.69	6.44	3.3	5866.14	4.92	1.64	0.13	1.69	74.63	317.44	0.75	124.45	12.25	0	1.67	0	3.25	0.17	0.22	2.1
1	7	23.97	331.87	7.3	68.24	6.97	2.61	0.37	4.14	2025.57	0.72	1.26	0	2.4	67.27	378.91	1.11	137.53	17.54	0	1.57	0	0.7	0.19	0.34	2.94
1	7	8.31	296.19	3.42	29.68	21.76	18.26	7.64	1.35	95.84	7.43	2.42	5.84	0.45	76.89	139.75	0.36	67.49	0.61	0	0.51	0	0	0.03	0.1	0.15
1	7	1.79	286.83	1.37	39.06	34.2	13.85	8.44	2.07	48.48	3.4	1.42	0.2	0.57	35.82	84.35	0.13	22.55	0.05	0	0.8	0	1.28	0.02	0.04	0.09
1	7	12.23	350.59	9.23	75.06	19.81	0.95	0.1	3.61	77.71	0.16	0.45	0	2.86	30.56	337.97	3.3	397.18	0.13	0	0.78	0	0	0.31	0.08	5.24
1	7	13	354.51	9.07	74.82	20.18	1.57	0.31	4.62	83.95	0.16	0.71	0	0.91	17.3	89.15	2.6	68.8	0.13	0	0.62	0	0	0.08	0	1.02
1	7	3.47	326.84	5.93	59.99	34.72	6.71	1.11	0.84	249.45	2.98	1.47	103.04	0.79	17.07	96.91	0.55	74.62	0	0	1.31	0.07	0.14	0.06	0.11	0.22
1	7	5.98	300.95	6.88	59.72	33.03	3.62	0.91	0.94	267.19	1.42	0.73	118.81	0.84	18.65	101.79	0.63	84.8	0	0	0.74	0.08	0.02	0.06	0.13	0.26
1	7	30	343.8	9.08	73.7	0.66	0.89	0.13	2.58	1.2	0.11	0.41	0	0.56	5.5	151.9	0.52	58.8	0	0	0.16	0	0	0.09	0.01	0.63
1	7	21.3	343.8	9.08	73.7	0.66	0.89	0.13	2.58	1.2	0.11	0.41	0	0.56	5.5	151.9	0.52	58.8	0	0	0.16	0	0	0.09	0.01	0.63
1	7	2.19	50.95	1.85	8.38	0.16	1.07	0.19	1.38	48.47	0.41	0.4	0	0.65	11.97	54	0.51	45.56	0	0	0.19	0	0	0.08	0	0.14
1	7	2.49	40.15	1.08	7.27	1.81	0.71	0.14	0.99	43.59	0.25	0.28	0	0.65	18.49	41.28	0.32	34.7	0	0	0.05	0	0	0.07	0.02	0.24
1	7	2	439.12	4.29	34.39	0.4	27.73	12.72	1.2	293.41	9.75	2.83	0.25	0.24	7.8	73.17	0.26	31.39	297.03	0	2.23	0.09	1.78	0.04	0.01	0.3
1	7	2.36	460.95	4.72	38.21	0.39	28.47	8.17	1.35	389.91	12.11	4.93	0.42	0.28	6.39	79.89	0.25	31.95	0.04	0	3.75	0	3.44	0.05	0.01	0.33
1	7	14.32	337.4	5.52	32.32	23.77	20.75	11.07	1.53	70.78	6.92	1.36	178.04	1.53	66.61	210.93	0.85	128.43	0.36	0.37	0.97	0.2	0.11	0.07	0.14	0.37
1	7	18.65	462.64	4.51	48	41.52	28.22	6.25	2.47	125.91	12.47	5.26	54.07	2.36	20.03	273.13	0.66	78.76	0.04	0.03	4.24	0.04	0.96	0.03	0.09	0.23

## Sheet: legend
LEGEND
Product
code	label
0	gluten free
1	gluten containing
Food Category
code	label
1	flour/bake mix
2	bread and bakery products
3	pasta and cereal products
4	cereals
5	cookie and cakes
6	snacks
7	convenience foods
MUFA = monounsaturated fatty acids
PUFA = Polyunsaturated fatty acids
n.d = no data
